# Supplementary material for: Treatment of ultra-high concentration 2-diazo-4,6-dinitrophenol (DDNP) industry wastewater by the combined Fe/Cu/air and Fenton process
Source: Royal Society of Chemistry journal article supplement (doi:10.1039/c6ra05371h), 2016-01-01
Supplement: c6ra05371h1.pdf [file c6ra05371h1.pdf]

**Supporting Information for**

**Treatment of ultra-high concentration 2-diazo-4,6-dinitrophenol  
(DDNP) industry wastewater by the combined Fe/Cu/air and  
Fenton process**

Yue Yuan<sup>1</sup>, Pengmu Cao<sup>2</sup>, Bo Lai<sup>1\*</sup>, Ping Yang<sup>1</sup>, Yuexi Zhou<sup>3</sup>

*1. Department of Environmental Science and Engineering, School of Architecture and Environment, Sichuan University, Chengdu 610065, China*

*2. Sichuan Yibin Weili Chemical Industry Limited Liability Company, Yibin, 644600, China*

*3. Research Center of Water Pollution Control Technology, Chinese Research Academy of Environmental Sciences, Beijing 100012, China*

\* Corresponding author. Tel/fax: +86 18682752302; E-mail: [laibo@scu.edu.cn](mailto:laibo@scu.edu.cn)

Submitted to  
**RSC Advances**

**Summary:**

Page 2: Table S1

Page 3: Table S1

---

\* Corresponding authors. Tel./fax: +86 18682752302  
E-mail address: [laibo@scu.edu.cn](mailto:laibo@scu.edu.cn) (Bo Lai)

**Table S1. Characteristics of DDNP industry wastewater**

| Items            | Values    | Items    | Values      |
|------------------|-----------|----------|-------------|
| COD              | 4740 mg/L | pH       | 4.8         |
| BOD <sub>5</sub> | —         | Colority | 50000 times |
| TOC              | 1022 mg/L | DDNP     | 3131 mg/L   |

**Table S2. The operating conditions of three control experiments**

| NO. | Experiment                                                                                                               | Operating conditions                                                                                                                                                                                                                                                                                                                                                                                                                                                                                            |
|-----|--------------------------------------------------------------------------------------------------------------------------|-----------------------------------------------------------------------------------------------------------------------------------------------------------------------------------------------------------------------------------------------------------------------------------------------------------------------------------------------------------------------------------------------------------------------------------------------------------------------------------------------------------------|
| 1   | 1 <sup>st</sup> Fe/Cu/air-2 <sup>nd</sup> Fenton-3 <sup>rd</sup> Fe <sup>0</sup> /Cu/air                                 | <b>1<sup>st</sup>Fe/Cu/air:</b> Fe/Cu dosage of 40 g/L, initial pH of 2.0, stirring speed of 300 rpm, initial 1.0 h without aeration, and then aeration treatment (1.5 L/min) of 0.5 h; <b>2<sup>nd</sup>Fenton:</b> H <sub>2</sub> O <sub>2</sub> dosage of 10 mmol/L, initial pH of 3.0, stirring speed of 200 rpm, and treatment time of 2.0 h; <b>3<sup>rd</sup>Fe<sup>0</sup>/air:</b> Fe/Cu dosage of 40 g/L, initial pH of 3.0, stirring speed of 300 rpm, aeration (1.5 L/min) treatment time of 1.0 h. |
| 1   | 1 <sup>st</sup> Fe <sup>0</sup> /air-2 <sup>nd</sup> Fenton-3 <sup>rd</sup> Fe <sup>0</sup> /air<br>(Control experiment) | In the control, only Fe/Cu bimetallic particles were replaced by Fe <sup>0</sup> , and the other experiment conditions were same as the optimal condition of the above 1 <sup>st</sup> Fe/Cu/air-2 <sup>nd</sup> Fenton-3 <sup>rd</sup> Fe/Cu/air.                                                                                                                                                                                                                                                              |
| 2   | Fe/Cu/air<br>(Control experiment)                                                                                        | Fe/Cu dosage of 40 g/L, initial pH of 2.0, stirring speed of 300 rpm, initial 1.0 h without aeration, and then aeration treatment (1.5 L/min) of 3.5 h.                                                                                                                                                                                                                                                                                                                                                         |
| 3   | Fenton process<br>(Control experiment)                                                                                   | H <sub>2</sub> O <sub>2</sub> dosage of 10 mmol/L, Fe <sup>2+</sup> dosage of 890.1 mg/L, initial pH of 3.0, stirring speed of 200 rpm, and treatment time of 4.5 h.                                                                                                                                                                                                                                                                                                                                            |
